# Supplementary material for: Diversity of Immobilized Bacterial Communities and Nitrates Removal by Instantaneous Heterotrophic Denitrification Treating Nitrate-Polluted Water Using 3D-BERs-GAC: Effects of pH and COD/NO3- -N Ratio
Source: Preprints.org preprint supplement (doi:10.20944/preprints202007.0162.v1), 2020-07-09
Supplement: Supplementary file 1 [file supplementary]

# Supplementary Information

## **Diversity of immobilized bacterial communities and nitrates removal by instantaneous heterotrophic denitrification treating nitrate-polluted water using 3D-BERs-GAC: Effects of pH and COD/NO<sub>3</sub><sup>-</sup> -N ratio**

Mahdi Hassan<sup>1</sup>, Guangcan Zhu<sup>\*1</sup>, Zhonglian Yang<sup>1</sup>, Yongze Lu<sup>1</sup>, Huang Shan<sup>1</sup>

<sup>1</sup>School of Energy and Environment, State Key Laboratory of Environmental Medicine Engineering of the Ministry of Education, Southeast University, Nanjing 210096, Jiangsu, China

### **\*Corresponding Author**

Prof.Dr. Guangcan Zhu<sup>\*1</sup>

Phone: +86-18912966396

Email: [gc-zhu@seu.edu.cn](mailto:gc-zhu@seu.edu.cn)

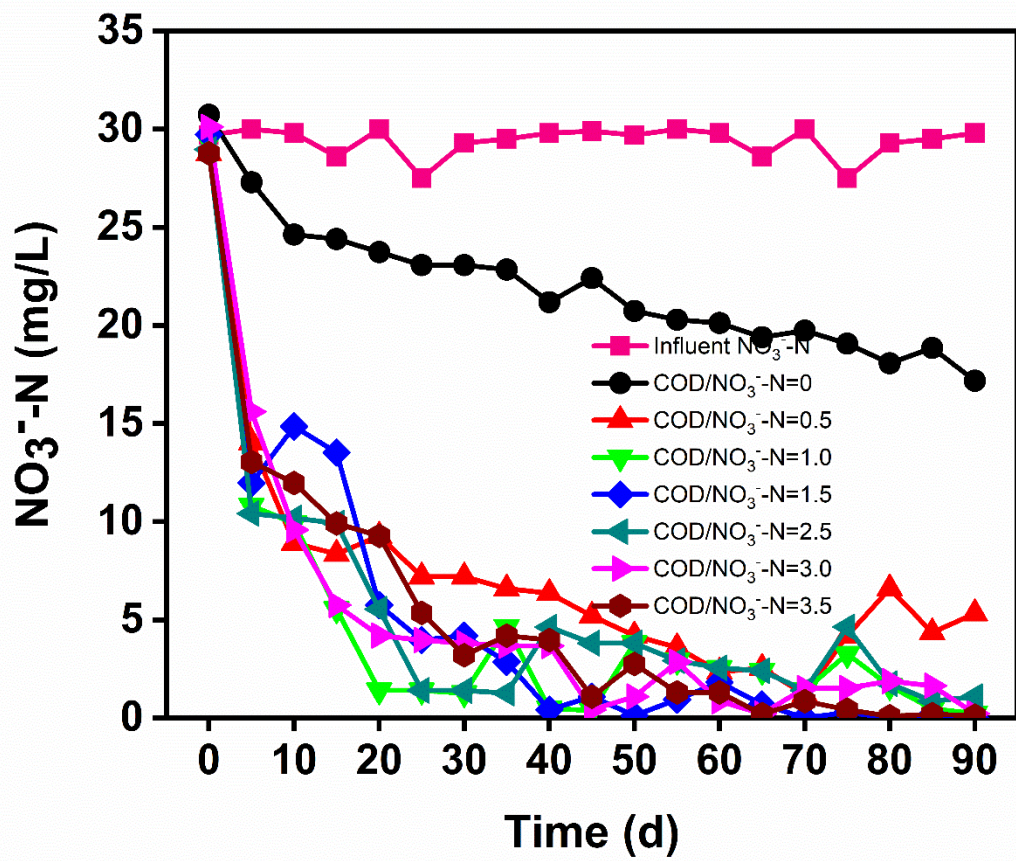

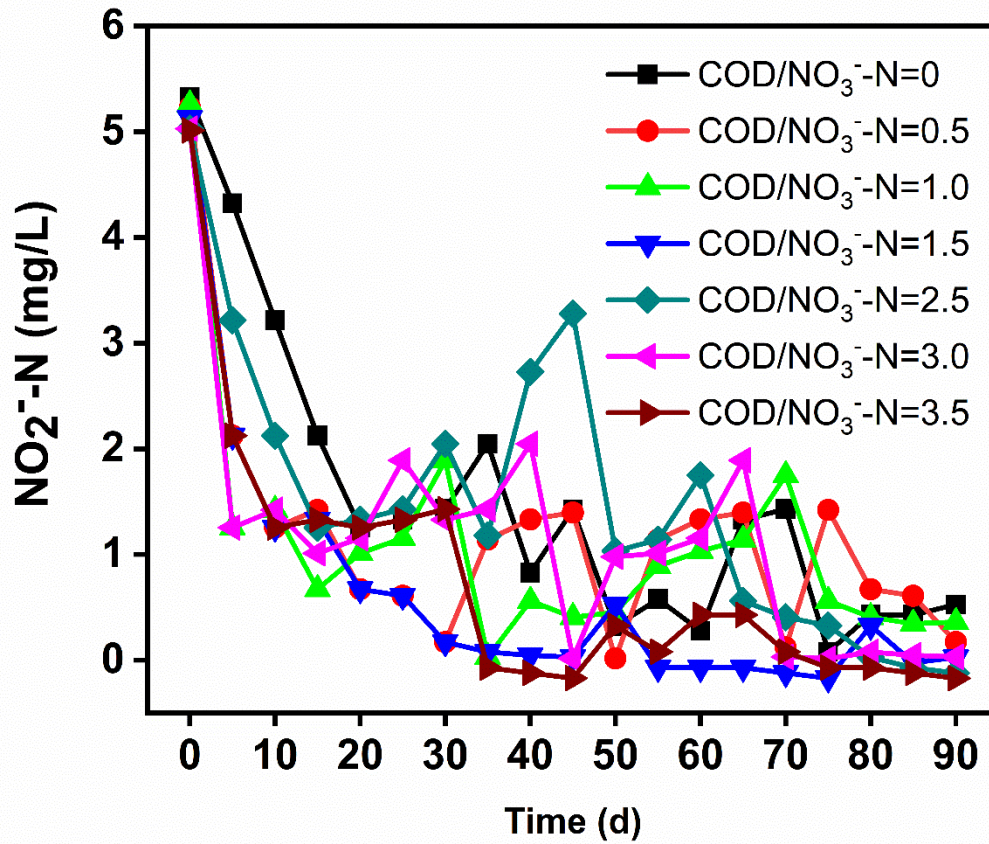

Fig.S1. The changes of nitrate and nitrite concentration during acclimated phase at variation of carbon to nitrogen ratio during heterotrophic denitrification process, under the experimental condition: i.e., pH=7.5±0.4, initial concentration of NO<sub>3</sub><sup>-</sup>-N = 30 ± 0.2 mgL<sup>-1</sup>, and the ratio of COD/NO<sub>3</sub><sup>-</sup>-N was 0-3.5, respectively.
